# Supplementary figures and images for: Real-space resolved surface reactions: deprotonation and metalation of phthalocyanine
Source: Royal Society of Chemistry journal article supplement (doi:10.1039/d2cp05716f), 2023-01-01

|----- d -----|

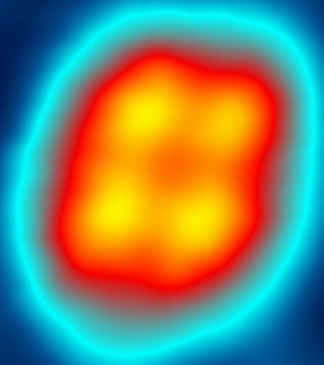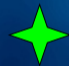

| 1 nm |

Supplement: d2cp05716f2.zip [file d2cp05716f2.zip]

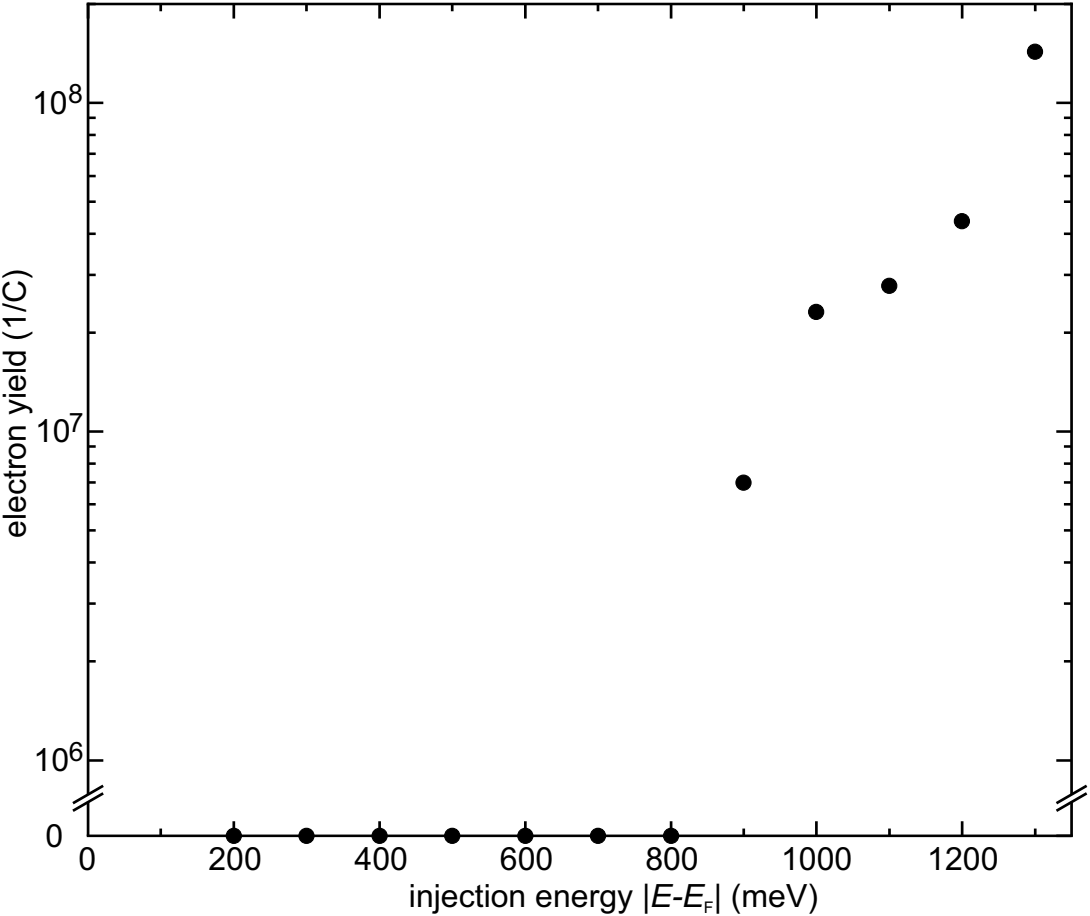

Supplement: d2cp05716f2.zip [file d2cp05716f2.zip]

RT

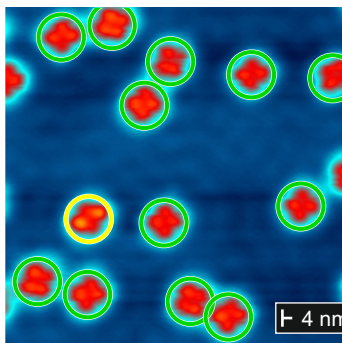

50°C

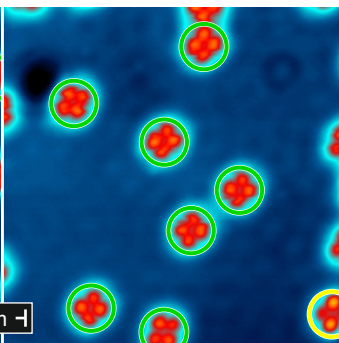

100°C

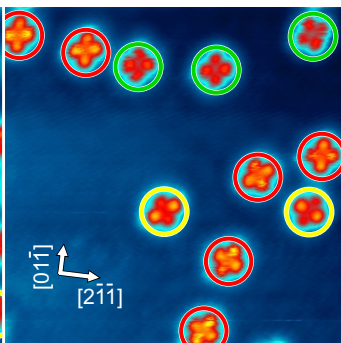

150°C

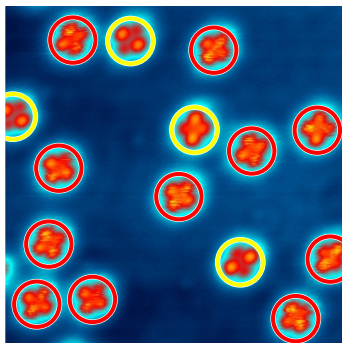

200°C

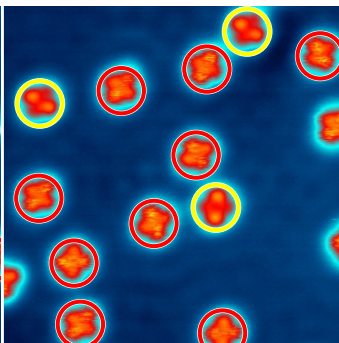

300°C

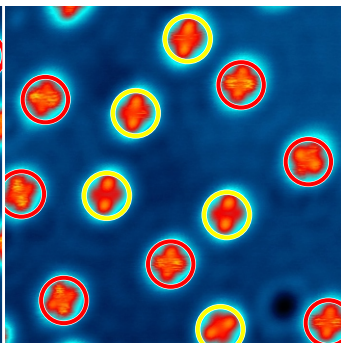

Supplement: d2cp05716f2.zip [file d2cp05716f2.zip]
